# Supplementary material for: Oligodendrocyte–axon metabolic coupling is mediated by extracellular K+ and maintains axonal health
Source: PubMed Central journal article supplement (PMC10917689; doi:10.1038/s41593-023-01558-3), 2024-01-24

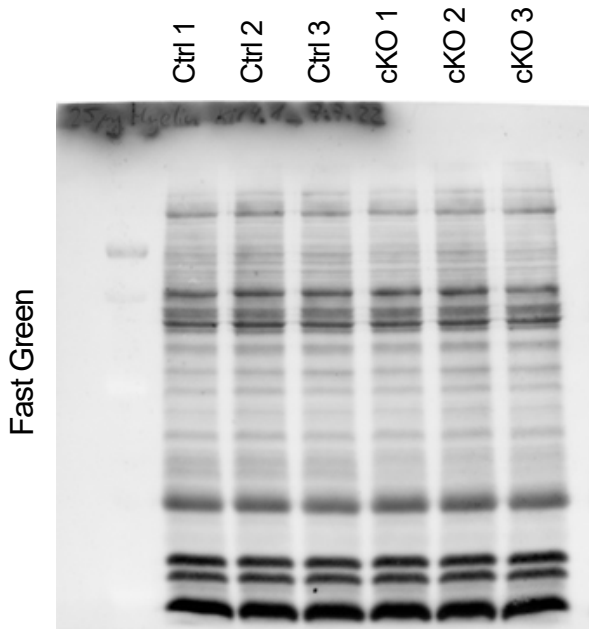

Loading 25  $\mu$ g myelin, 12% gel

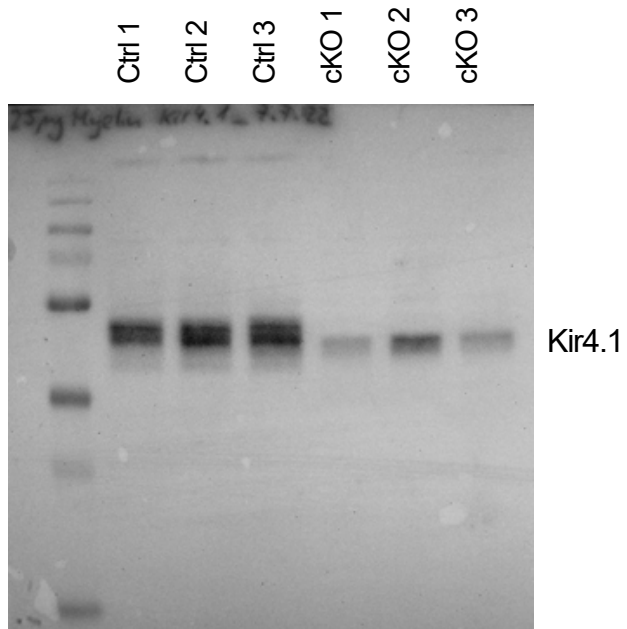

$\alpha$ -Kir4.1 (1:1000)

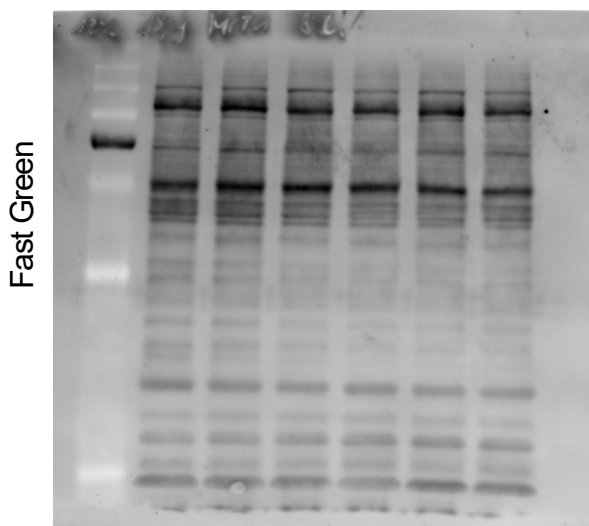

Loading 15  $\mu$ g myelin, 12% gel

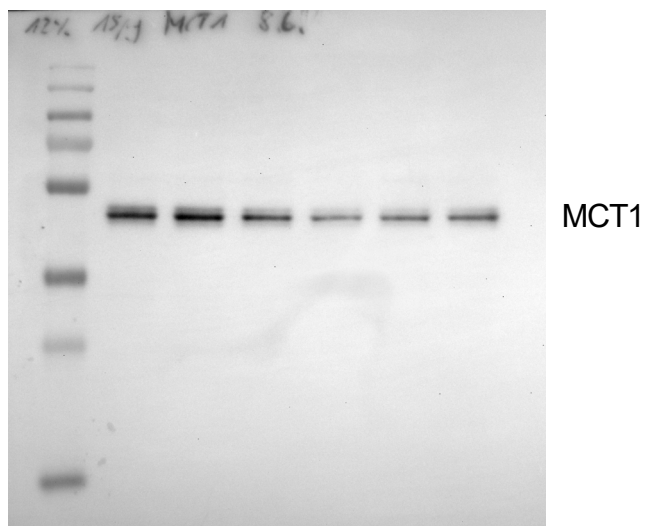

$\alpha$ -MCT1 (1:500)

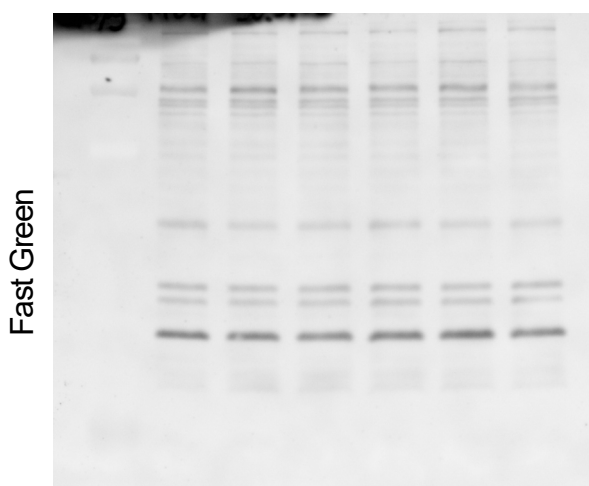

Loading 3.5  $\mu$ g myelin, 15% gel

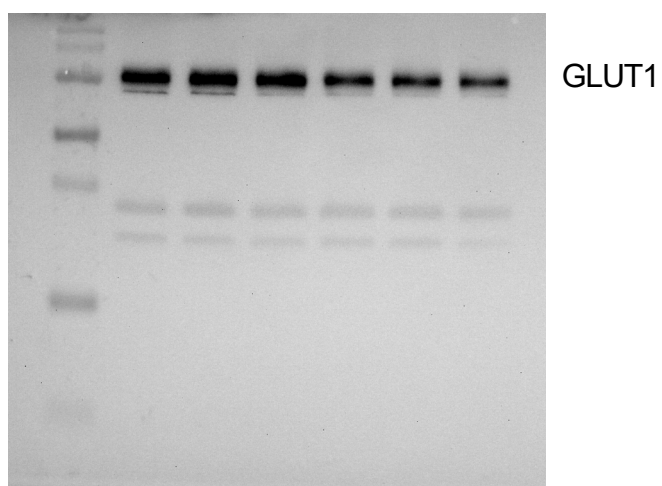

$\alpha$ -GLUT1 (1:500)

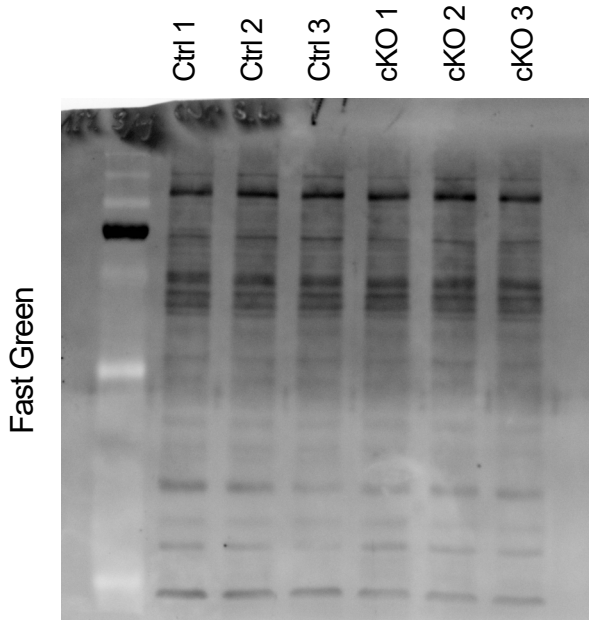

Loading 3  $\mu$ g myelin, 12% gel

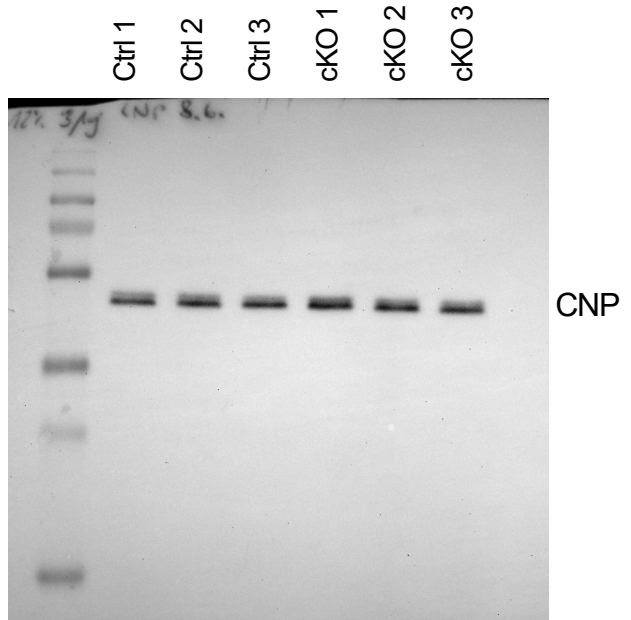

$\alpha$ -CNP (1:1000)

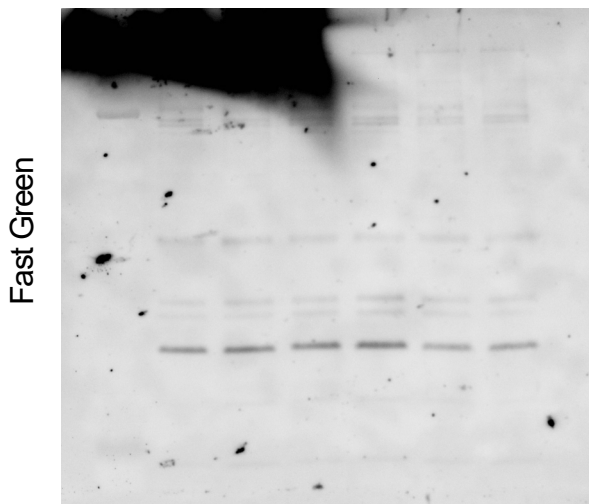

Loading 1  $\mu$ g myelin, 15% gel

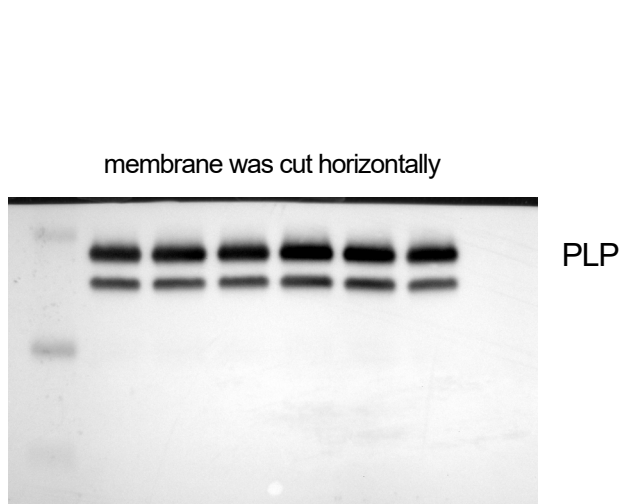

$\alpha$ -PLP (1:5000)

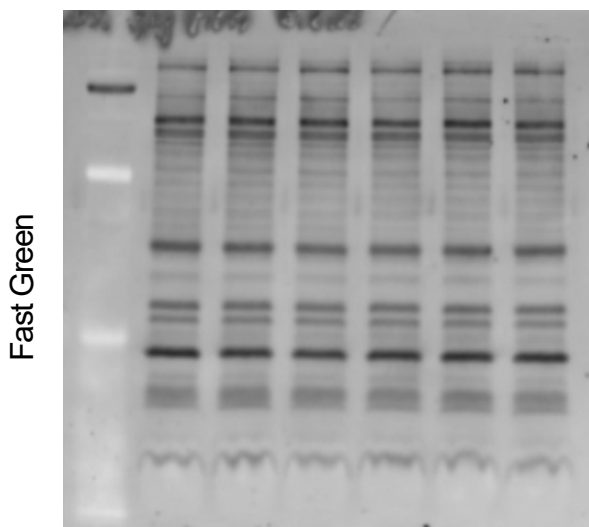

Loading 5  $\mu$ g myelin, 15% gel

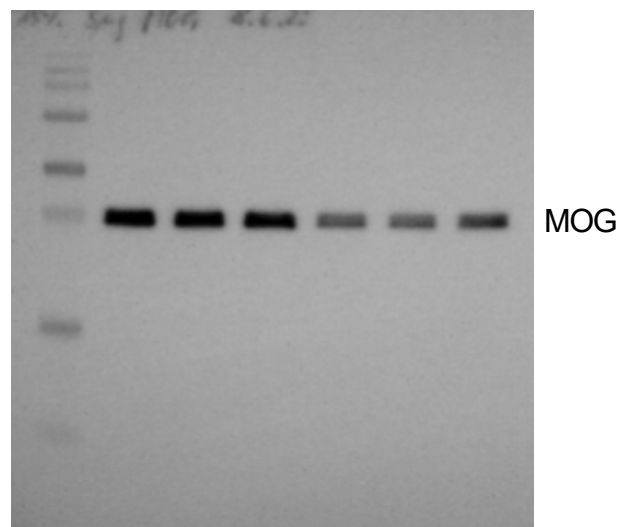

$\alpha$ -MOG (1:5000)

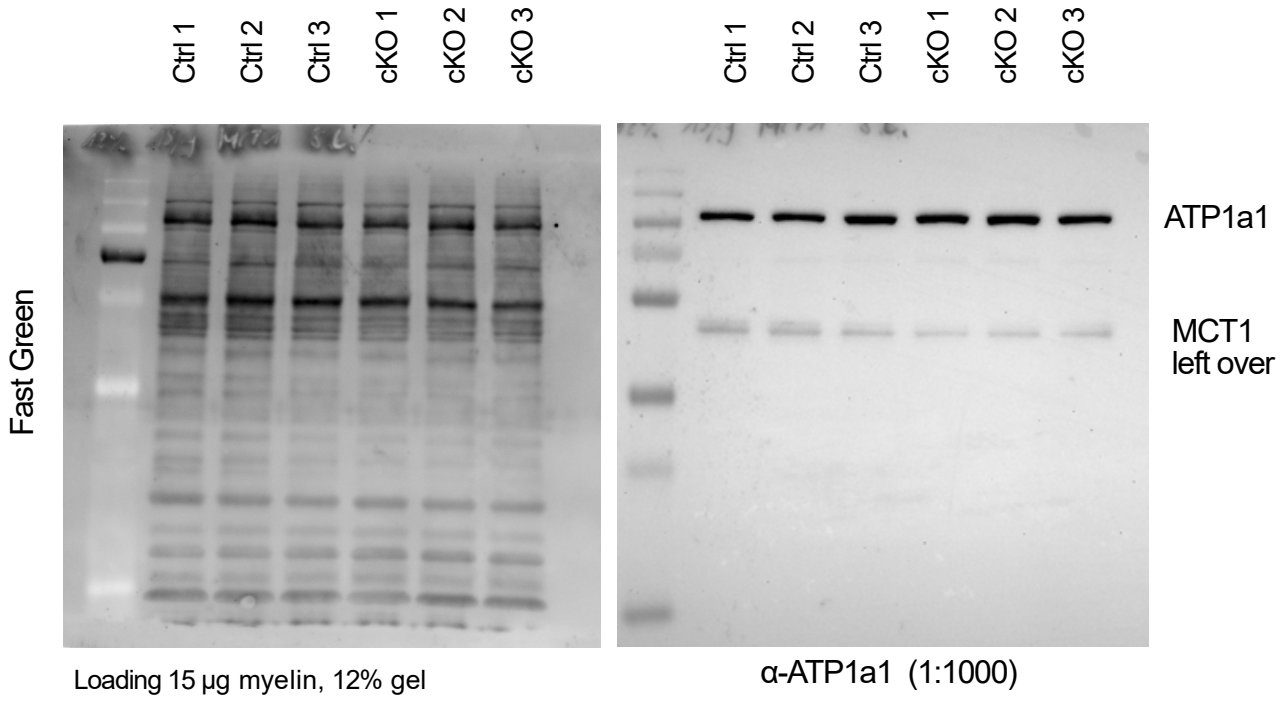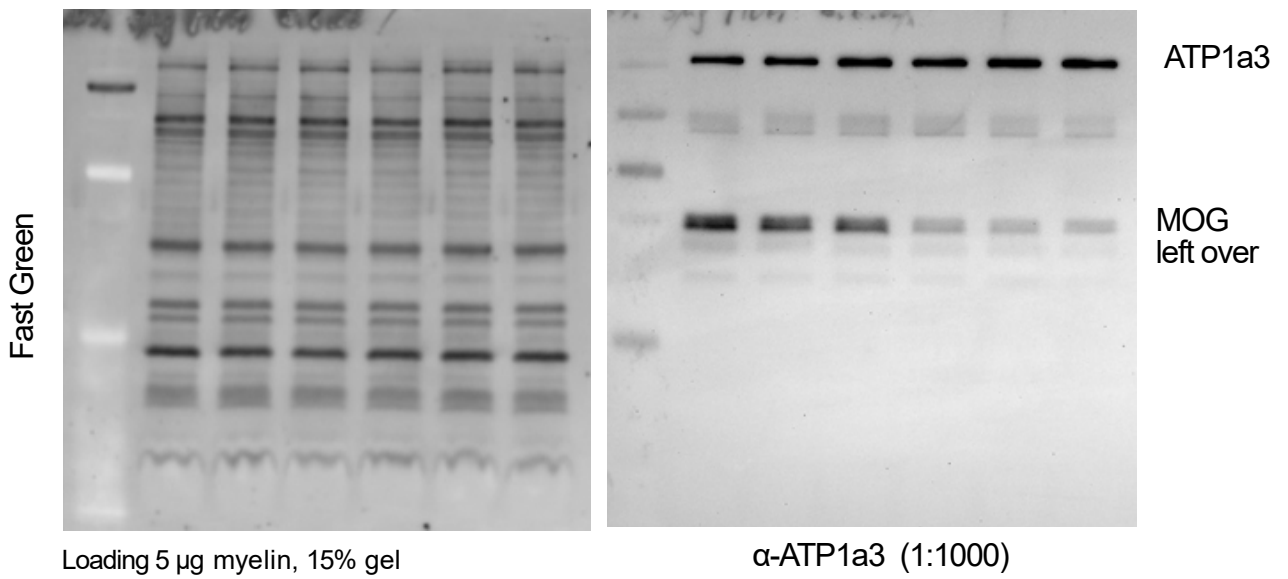

Supplement: 41593_2023_1558_MOESM5_ESM.pdf [file 41593_2023_1558_MOESM5_ESM.pdf]
